# Supplementary material
Source: publisher site journal article supplement (https://www.dovepress.com/article/476048)
Supplement: Supplementary file 1 [file get_supplementary_file.php]

**Catalogue**

Table S1. Relationship between univariate and the risk of any vascular complications……….2

Table S2. Covariance analysis……………………………………………………………………….3

Table S3. Relationship between RAR, leukocyte-derived ratio and eGFR……………...………4

Table S4. Relationship between RAR and diabetic retinopathy……………...…………………..5

Figure S1. ROC curve for RAR prediction of any vascular complication…...……………………6

Figure S2. ROC curves for RAR prediction of atherosclerosis of the lower limbs.……………..7

**Table S1. Relationship between univariate and the risk of any vascular complications**

| **Variables** | **Any vascular complication** | | |
| --- | --- | --- | --- |
| **OR** | **95%CI** | **P-value** |
| Male, n (%) | 0.705 | 0.415-1.198 | 0.196 |
| Age(years) | 1.112 | 1.080-1.144 | ＜0.001* |
| SBP(mmHg) | 1.013 | 0.996-1.031 | 0.131 |
| DBP(mmHg) | 0.982 | 0.952-1.014 | 0.271 |
| BMI(kg/m²) | 0.947 | 0.888-1.009 | 0.092 |
| Hb1c(%) | 0.994 | 0.948-1.043 | 0.819 |
| GLU(mmol/L) | 0.946 | 0.866-1.034 | 0.223 |
| Hgb(g/L) | 0.969 | 0.954-0.984 | ＜0.001* |
| HsCRP(mg/L) | 1.002 | 0.985-1.019 | 0.843 |
| TCH(mmol/L) | 0.906 | 0.758-1.083 | 0.276 |
| TG(mmol/L) | 0.998 | 0.820-1.214 | 0.984 |
| HDL(mmol/L) | 0.84 | 0.388-1.821 | 0.659 |
| LDL(mmol/L) | 0.847 | 0.655-1.095 | 0.205 |
| URIC(umol/L) | 1.001 | 0.999-1.003 | 0.368 |
| Duration of diabetes(years) | 1.088 | 1.042-1.135 | ＜0.001* |
| Use of insulin, n (%) | 1.163 | 0.635-2.132 | 0.625 |
| Use of oral hypoglycemic agents or GLP-1RAs, n (%) | 1.735 | 1.017-2.961 | 0.043* |
| Hypertension, n (%) | 3.857 | 2.242-6.635 | ＜0.001* |
| Hyperlipidemia, n (%) | 0.552 | 0.329-0.927 | 0.025* |
| Use of antihypertensive drugs, n (%) | 4.044 | 2.276-7.183 | ＜0.001* |
| Use of lipid-lowering drugs, n (%) | 2.794 | 1.165-6.703 | 0.021* |
| Smoking, n (%) | 1.539 | 0.879-2.694 | 0.131 |
| Drinking, n (%) | 1.467 | 0.838-2.569 | 0.18 |

* P < 0.05

Abbreviations: OR, odds ratio; CI, confidence interval; * P < 0.05,SBP, Systolic blood pressure; DBP, Diastolic blood pressure; HbA1c, Glycated hemoglobin A1c; HsCRP, Human hypersensitive C Reactive Protein; TCH, Total cholesterol; TG, Triglycerides; HDL-C, High-density lipoprotein cholesterol; LDL-C, Low-density lipoprotein cholesterol; URIC, Uric Acid; UACR, urinary albumin/creatinine ratio; RDW, Red blood cell distribution width.

**Table S2. Covariance analysis**

|  | **Tolerance** | **VIF** |
| --- | --- | --- |
| Sex | 0.757 | 1.322 |
| Age | 0.675 | 1.482 |
| BMI | 0.877 | 1.14 |
| Duration of diabetes | 0.734 | 1.362 |
| Hb1c | 0.947 | 1.056 |
| Hypertension | 0.28 | 3.577 |
| Hyperlipidemia | 0.804 | 1.244 |
| Smoking | 0.884 | 1.132 |
| Drinking | 0.905 | 1.105 |
| Use of antihypertensive drugs | 0.273 | 3.668 |
| Use of lipid-lowering drugs | 0.883 | 1.132 |
| Use of oral hypoglycemic agents or GLP-1RAs | 0.848 | 1.179 |
| Use of insulin | 0.859 | 1.164 |
| TCH | 0.713 | 1.402 |
| TG | 0.761 | 1.314 |
| HsCRP | 0.953 | 1.05 |
| Hgb | 0.85 | 1.177 |

Abbreviations: VIF, variance inflation factor; HbA1c, Glycated hemoglobin A1c; HsCRP, Human hypersensitive C Reactive Protein; TCH, Total cholesterol; TG, Triglycerides.

**Table S3. Relationship between RAR, leukocyte-derived ratio and eGFR**

| **Variables** | **eGFR** |  |
| --- | --- | --- |
| **OR (95% CI)d** | **P-value** |
| **RAR** | 1.846(1.122,3.039) | 0.016* |
| Q1 | Reference |  |
| Q2 | 0.594(0.225,1.573) | 0.295 |
| Q3 | 0.909(0.359,2.303) | 0.84 |
| Q4 | 1.231(0.495,3.058) | 0.655 |
| P-trend |  | 0.4 |
| **NLR** | 1.514(1.235,1.856) | ＜0.001* |
| **PLR** | 1.012(1.006,1.017) | ＜0.001* |

* P < 0.05

Abbreviations: Odds ratios (OR) ; 95% confidence intervals (95%CI); red cell distribution width/albumin ratio (RAR); neutrophils/lymphocytes (NLR); platelets/lymphocytes (PLR).

d Model 4：Adjusted for sex, age, BMI, duration of diabetes, Hb1c, hypertension, hyperlipidemia, smoking, drinking, use of antihypertensive medications, use of lipid-lowering medications, use of oral hypoglycemic agents or GLP-1RA, use of insulin, TCH, TG, HsCRP, Hgb.

**Table S4. Relationship between RAR and diabetic retinopathy**

| **Variables** | **Diabetic retinopathy** |  |
| --- | --- | --- |
| **OR (95% CI)d** | **P-value** |
| **RAR** | 1.286(0.864,1.915) | 0.215 |
| Q1 | Reference |  |
| Q2 | 0.836(0.448,1.562) | 0.575 |
| Q3 | 0.779(0.409,1.485) | 0.448 |
| Q4 | 1.183(0.633,2.211) | 0.598 |
| P-trend |  | 0.575 |

* P < 0.05

Abbreviations: Odds ratios (OR) ; 95% confidence intervals (95%CI); red cell distribution width/albumin ratio (RAR).

d Model 4：Adjusted for sex, age, BMI, duration of diabetes, Hb1c, hypertension, hyperlipidemia, smoking, drinking, use of antihypertensive medications, use of lipid-lowering medications, use of oral hypoglycemic agents or GLP-1RA, use of insulin, TCH, TG, HsCRP, Hgb.


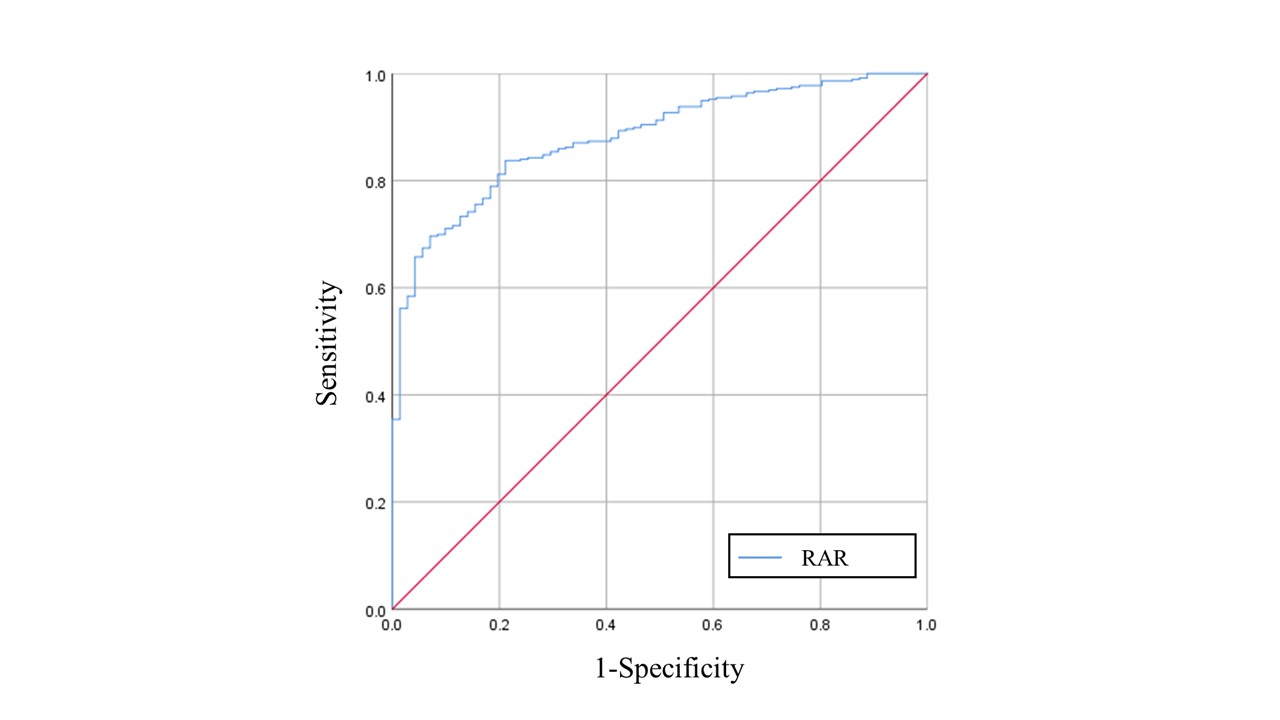


**Figure S1. ROC curve for RAR prediction of any vascular complication**


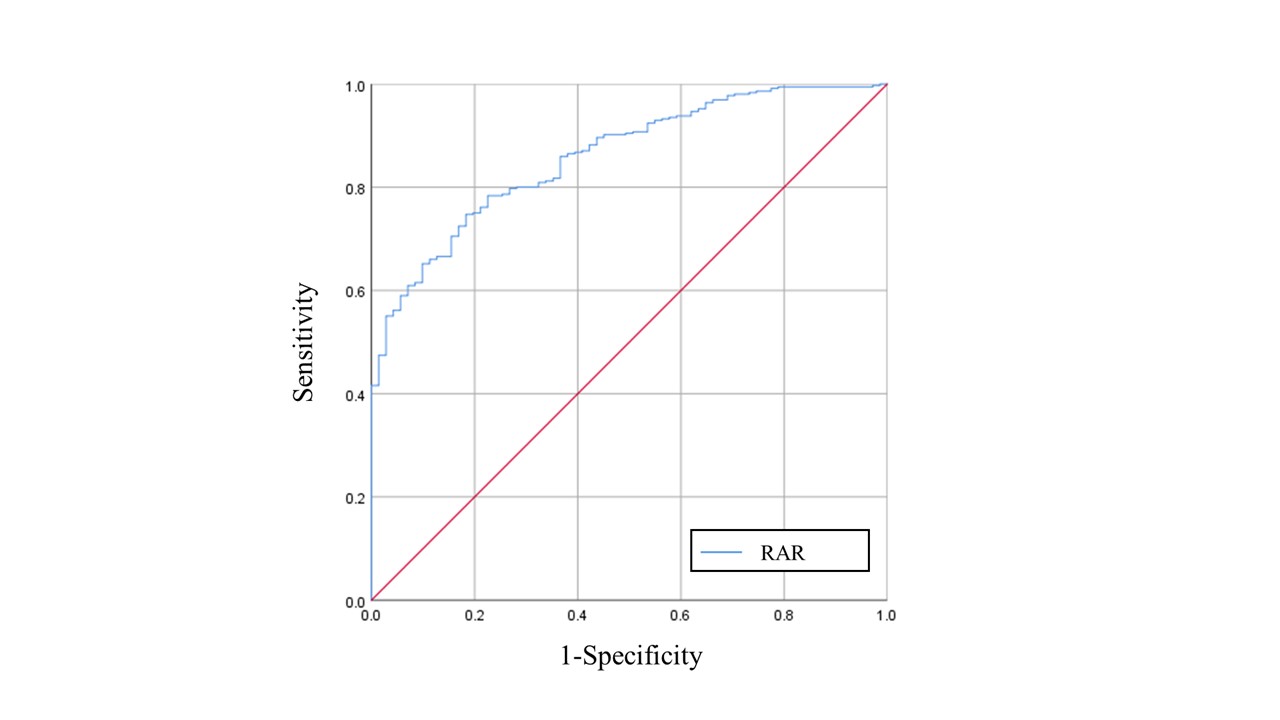


**Figure S2. ROC curves for RAR prediction of atherosclerosis of the lower limbs**
